# Supplementary material
Source: MDPI journal article supplement (https://www.mdpi.com/2072-4292/14/18/4611)
Supplement: s1 [file s1]

## Supplementary Materials

### **Can satellite and atmospheric reanalysis products capture compound moist heat stress-floods?**

*Lei Gu<sup>1\*</sup>, Ziye Gu<sup>1</sup>, Qiang Guo<sup>2</sup>, Wei Fang<sup>1</sup>, Qianyi Zhang<sup>1</sup>, Huaiwei Sun<sup>1</sup>, Jiabo Yin<sup>3</sup>, Jianzhong Zhou<sup>1</sup>*

<sup>1</sup>School of Civil and Hydraulic Engineering, Huazhong University of Science and Technology, Wuhan, 500074, China

<sup>2</sup>Department of Civil Engineering, The University of Tokyo, Tokyo, 113-0033, Japan

<sup>3</sup>State Key Laboratory of Water Resources and Hydropower Engineering Science, Wuhan University, Wuhan, 500072, China

\*Correspondence: Lei Gu ([shisan@hust.edu.cn](mailto:shisan@hust.edu.cn))

#### **Contents of this file**

Figures S1to S11

Tables S1-S4

#### **Introduction**

This document provides 11 supplementary figures and 4 supplementary tables, which are referred to in the main text as Fig. S1-S11, Tab. S1-S4.

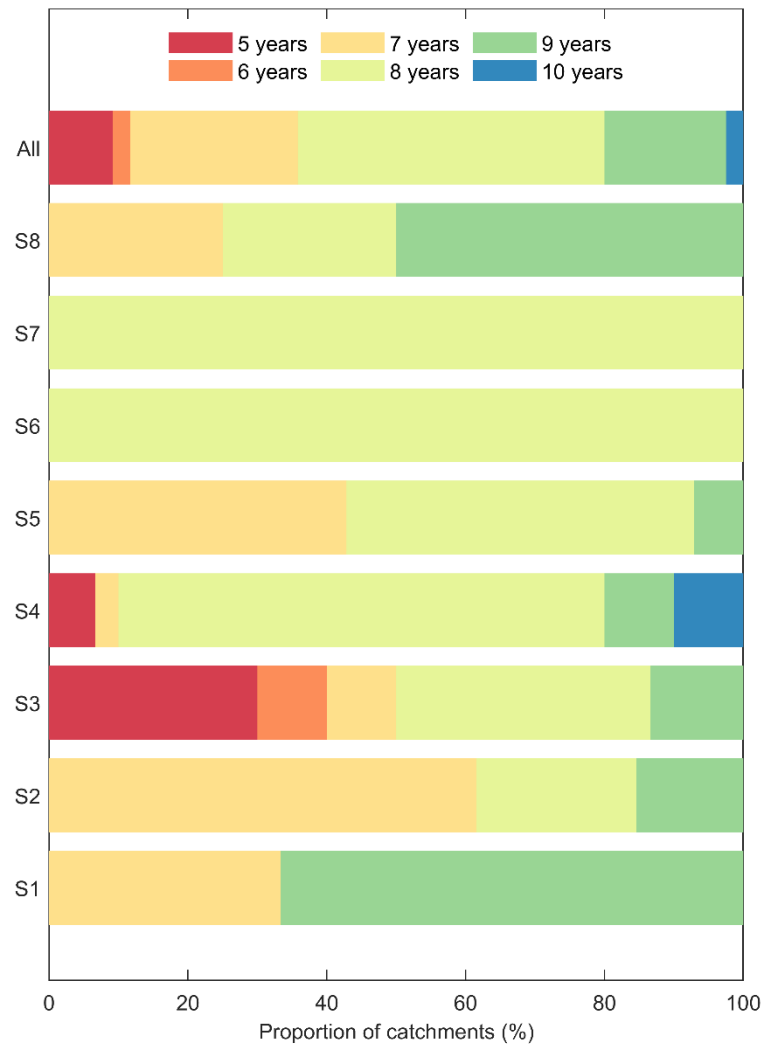

**Figure S1.** The proportion of catchments for the 5-, 6-, 7-, 8-, 9-, 10-year daily streamflow record lengths in S1-S8 sub-regions and whole areas, respectively.

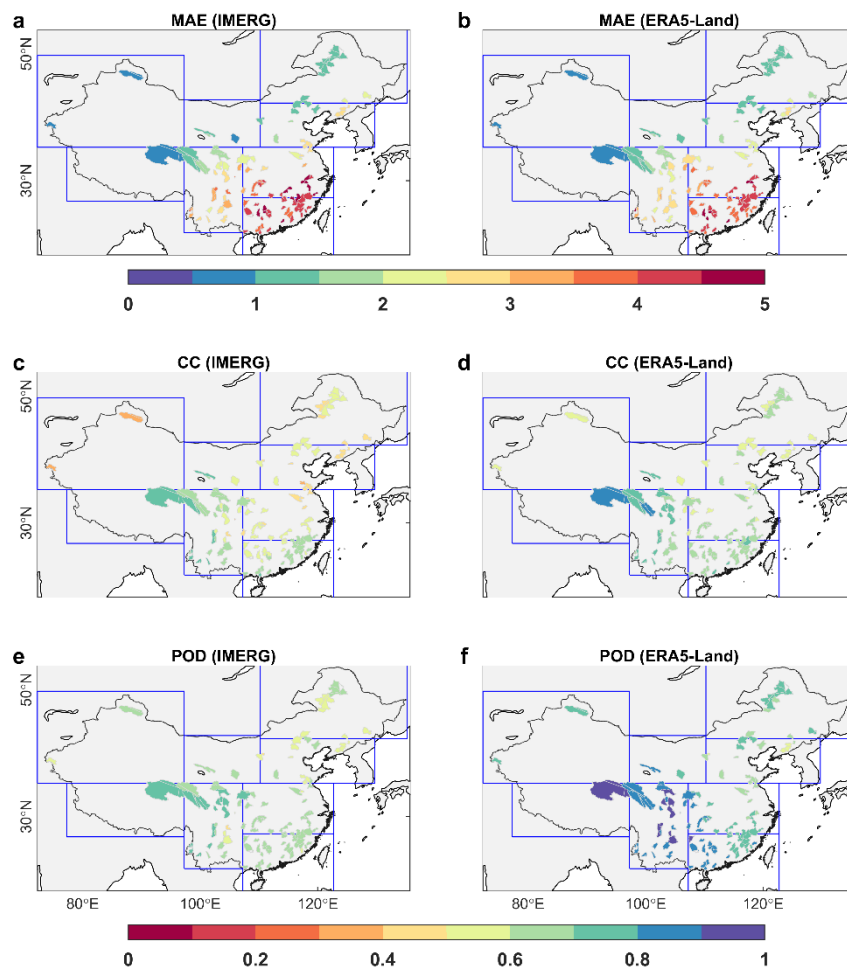

**Figure S2.** The MAE, CC and POD metrics of IMERG and ERA5-Land precipitation products in 120 catchments over mainland China.

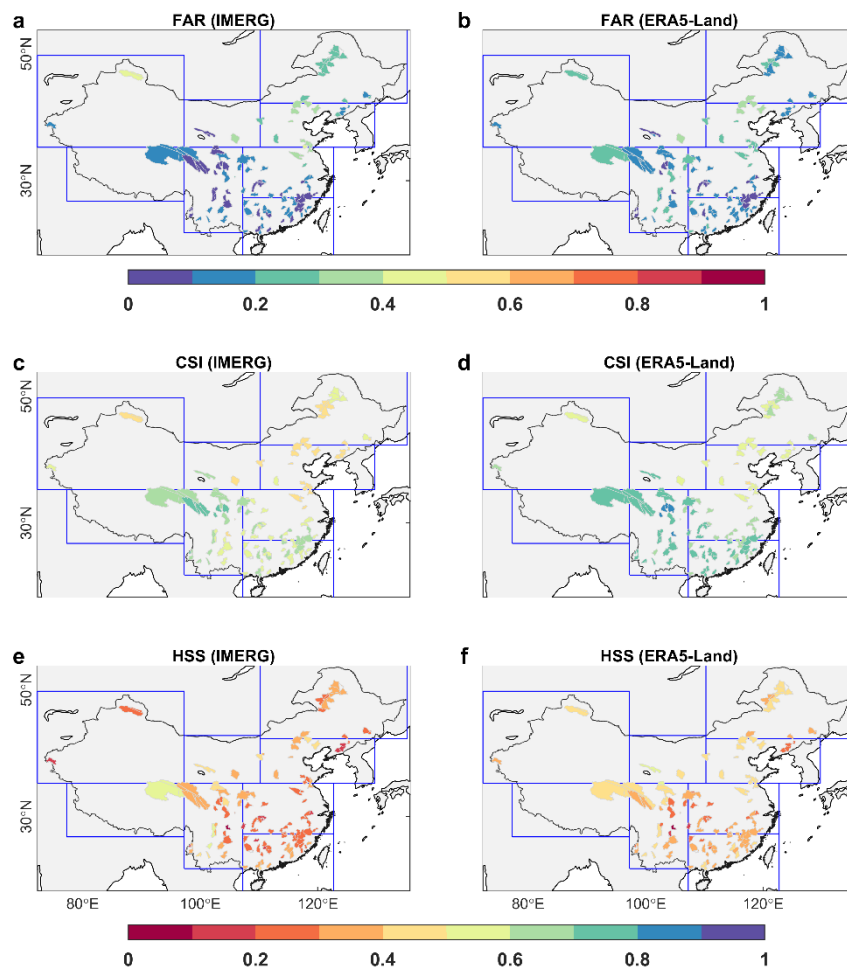

**Figure S3.** The FAR, CSI and HSS metrics of IMERG and ERA5-Land precipitation products in 120 catchments over mainland China.

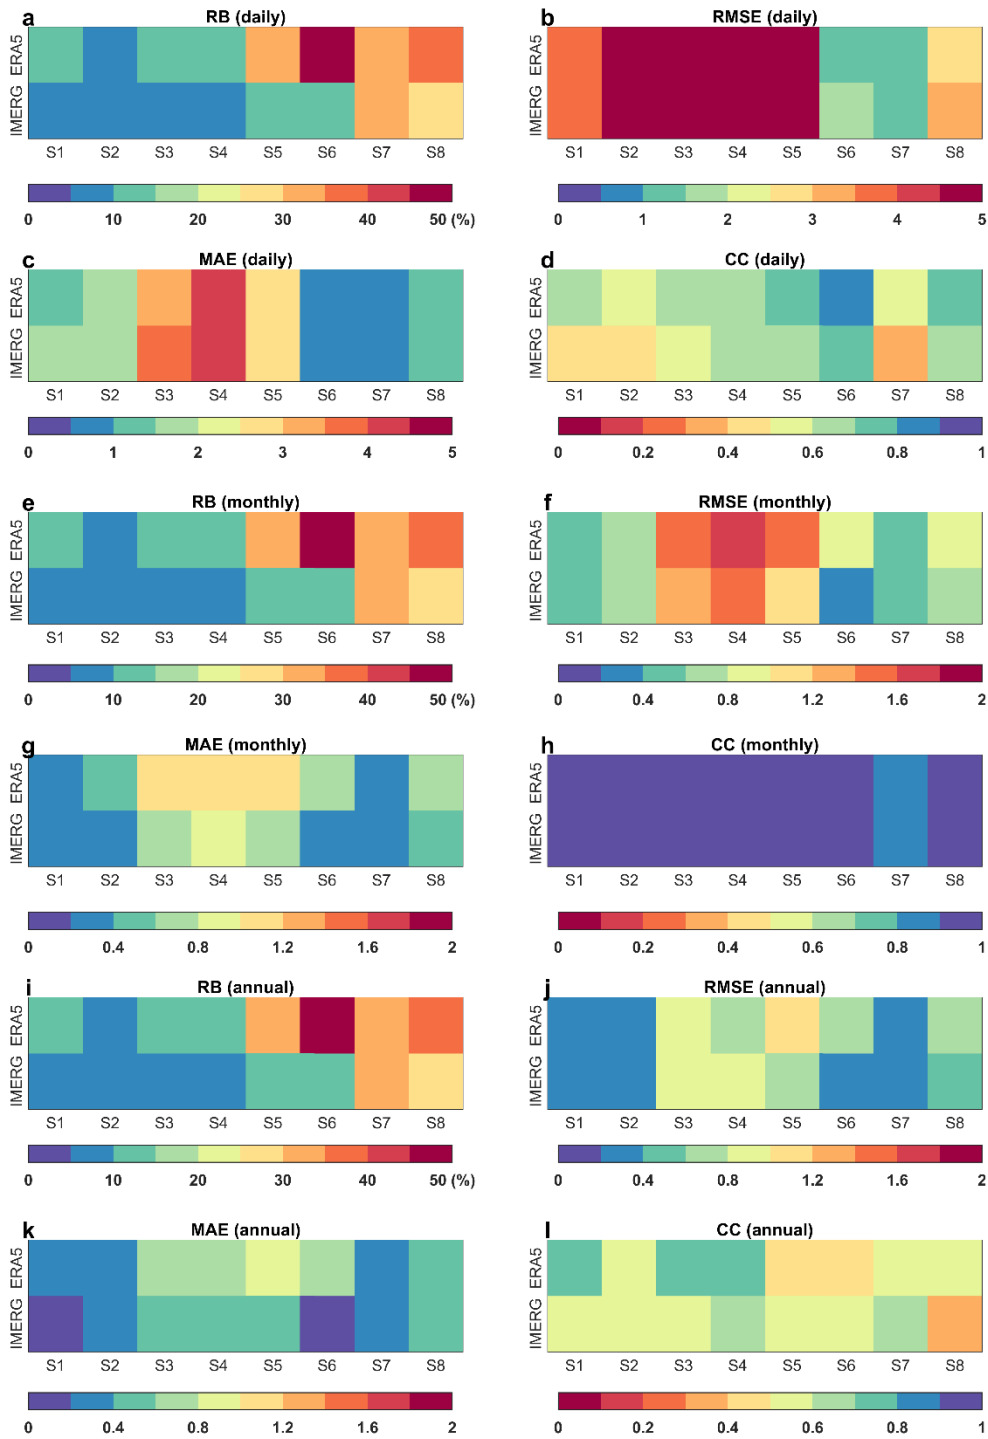

**Figure S4.** Daily-, monthly- and annual-average statistical metrics of IMERG (IMERG) and ERA5-Land (ERA5) precipitation products in eight sub-regions over mainland China. RB denotes relative bias (absolute mean values across catchments in each sub-region, to avoid offset between positive and negative biases); RMSE refers to root mean square error.

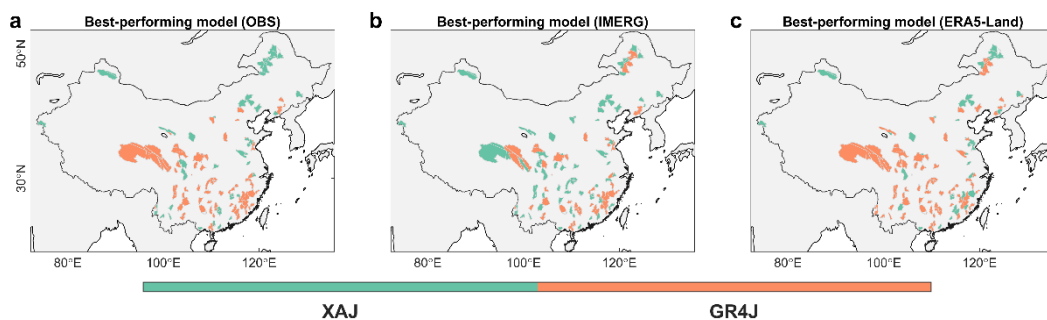

**Figure S5.** The best-performing hydrological model calibrated by gridded observations, IMERG and ERA5-Land precipitation datasets during calibration and validation periods over 120 catchments.

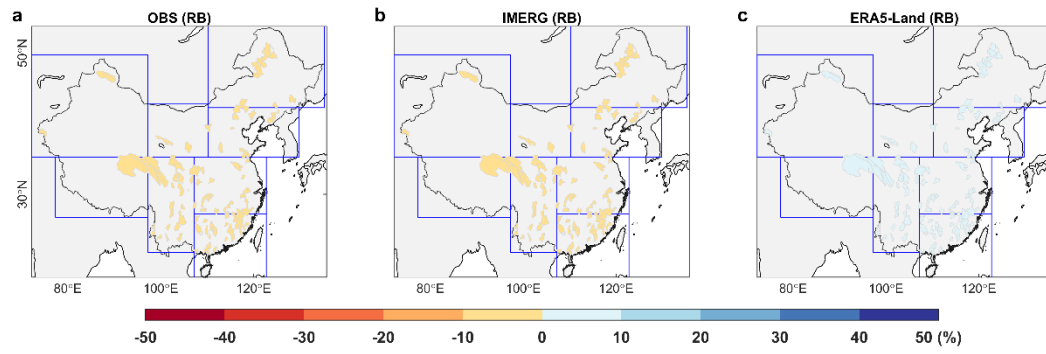

**Figure S6.** The relative bias ( $RB = (\text{simulation} - \text{observation}) / \text{observation}$ ) of hydrological simulations forced by gridded observations, IMERG and ERA5-Land precipitation datasets against streamflow records over 120 catchments.

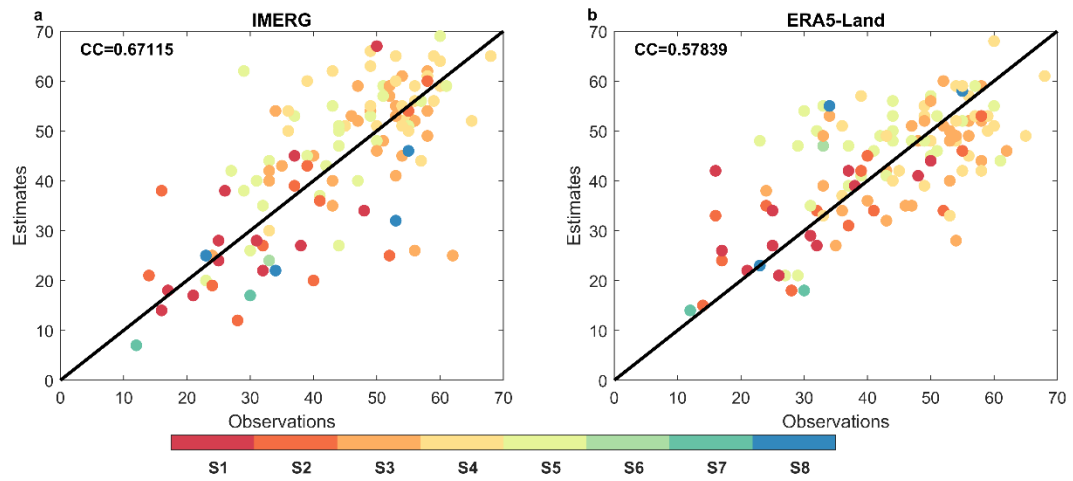

**Figure S7.** Scatter plots of flood frequency from IMERG and ERA5-Land products against gridded observation (CN05.1) in 120 catchments of China.

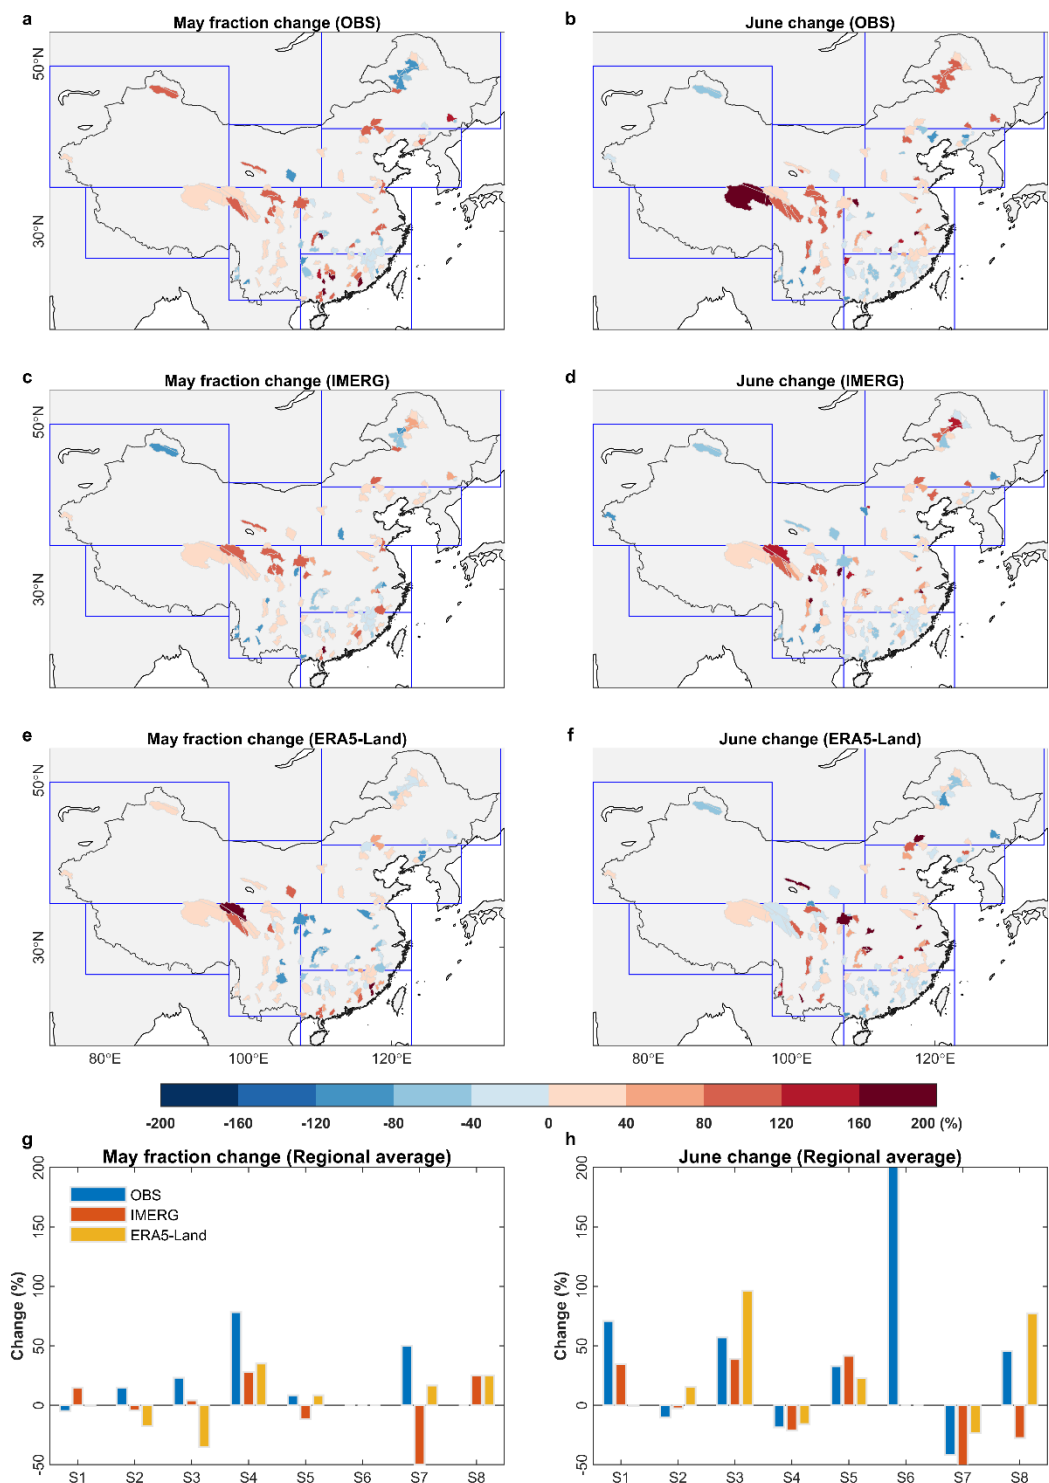

**Figure S8.** The changes of average flood fraction in May (May) and June (June) of 2011-2020 against 2001-2010 period for each catchment and eight spatial regions by gridded observations, IMERG and ERA5-land datasets.

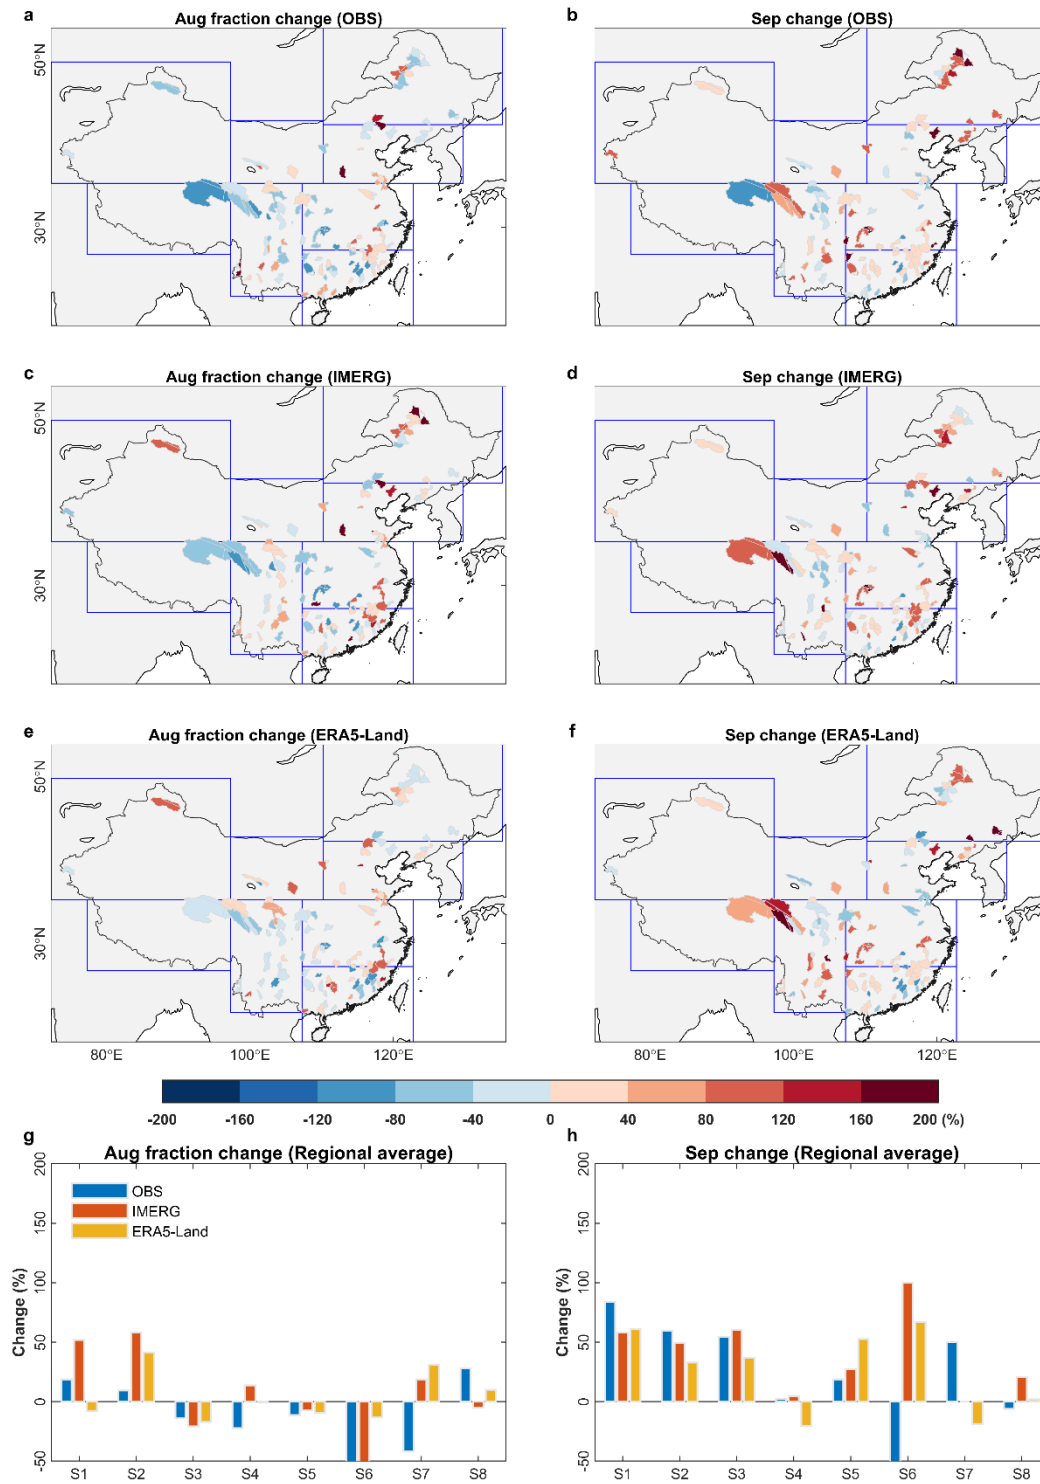

**Figure S9.** The changes of average flood fraction in August (Aug) and September (Sep) of 2011-2020 against 2001-2010 period for each catchment and eight spatial regions by gridded observations, IMERG and ERA5-land datasets.

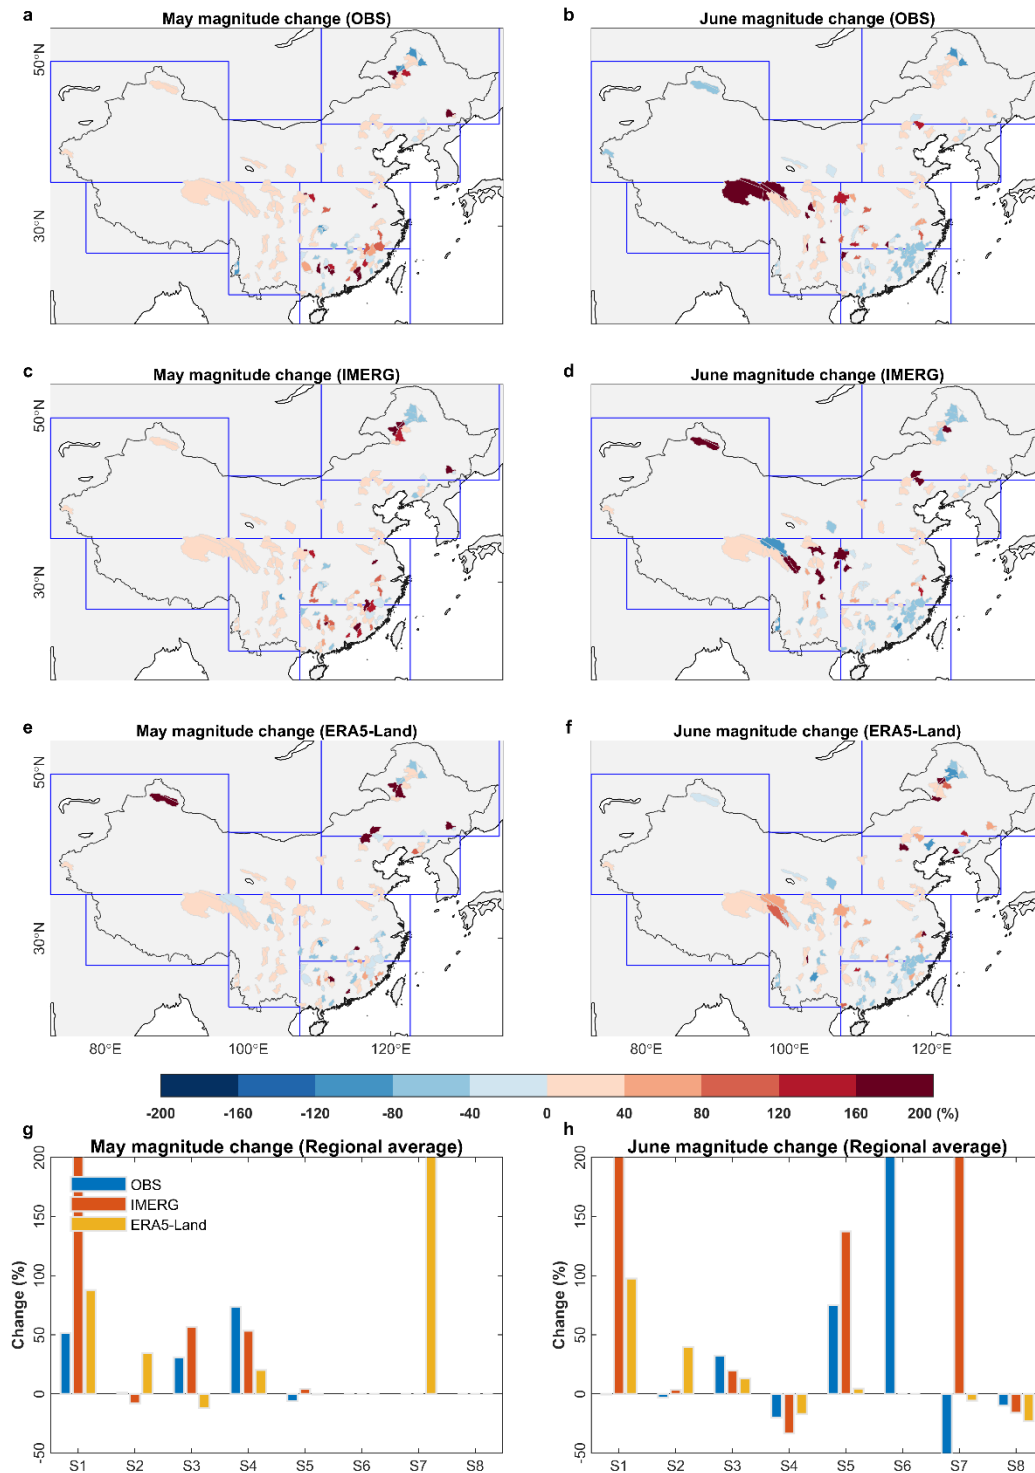

**Figure S10.** The changes of average flood magnitude in May and June of 2011-2020 against 2001-2010 period for each catchment and eight spatial regions by gridded observations, IMERG and ERA5-land datasets.

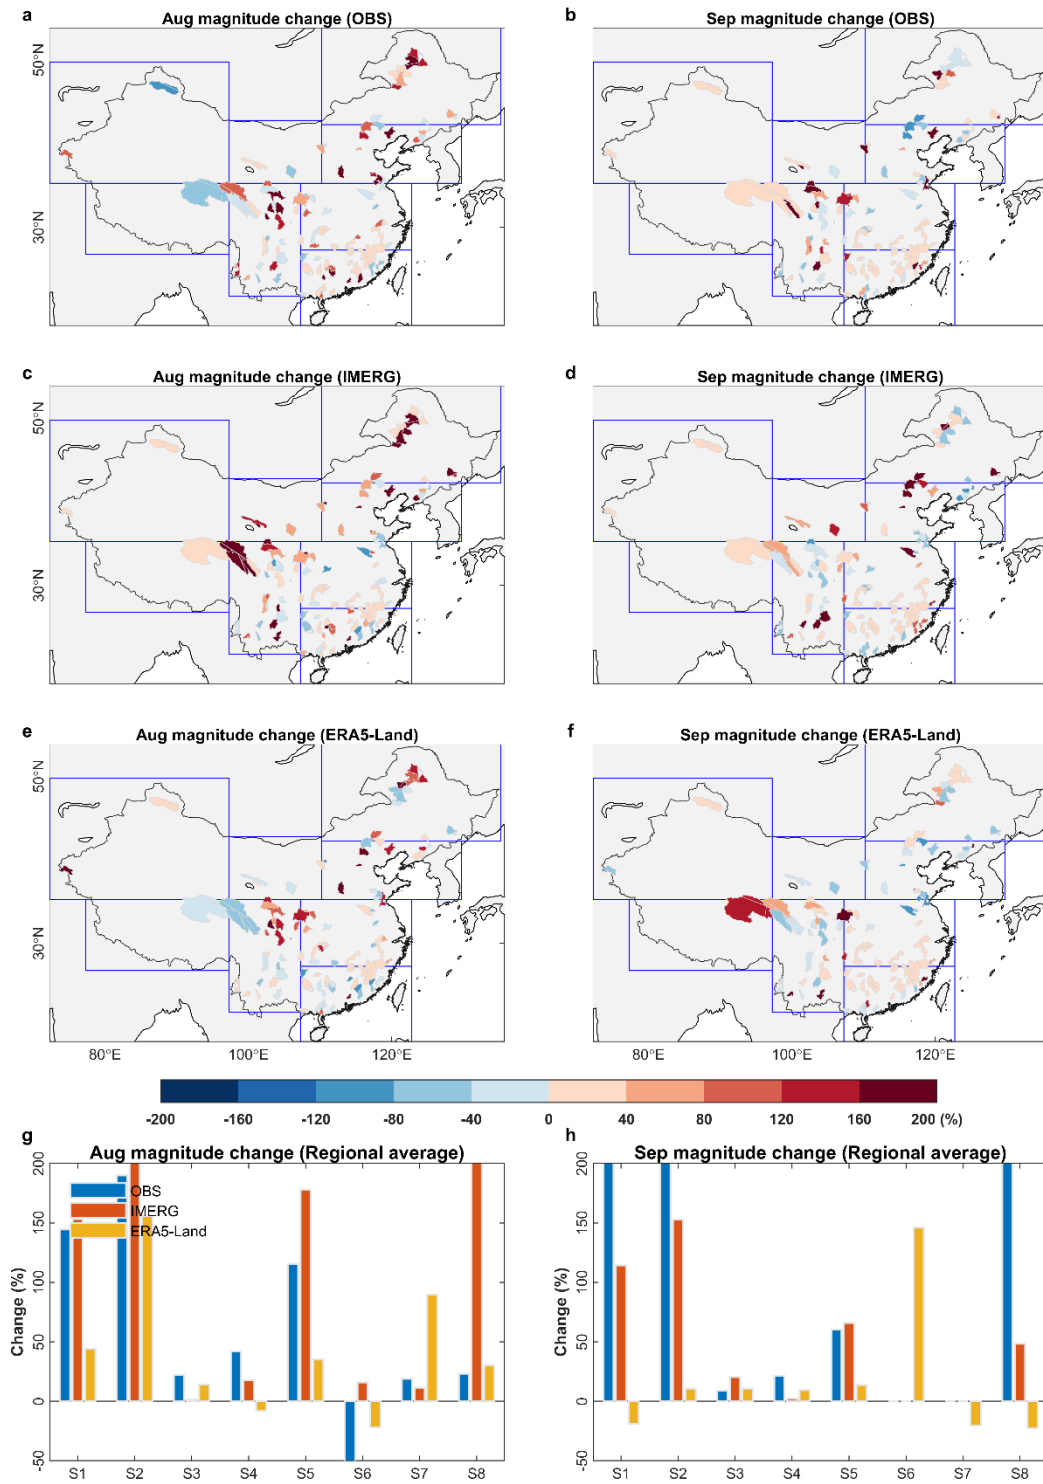

**Figure S11.** The changes of average flood magnitude in August and September of 2011-2020 against 2001-2010 period for each catchment and eight spatial regions by gridded observations, IMERG and ERA5-land datasets.

**Table. S1** The difference of monthly flood fractions of IMERG (ERA5 Land) against OBS (Unit: %).

|               | Jan   | Feb   | Mar   | Apr   | May   | Jun   | Jul        | Aug   | Sep   | Oct   | Nov   | Dec   |
|---------------|-------|-------|-------|-------|-------|-------|------------|-------|-------|-------|-------|-------|
| IMERG-OBS     |       |       |       |       |       |       |            |       |       |       |       |       |
| <b>S1</b>     | 0.05  | NaN   | NaN   | 0.59  | 3.02  | -1.56 | -1.08      | -3.40 | 1.67  | -0.03 | NaN   | NaN   |
| <b>S2</b>     | 0.20  | 0.21  | 1.40  | 0.42  | -0.09 | 0.04  | 1.91       | -8.54 | 2.30  | 1.37  | 0.07  | NaN   |
| <b>S3</b>     | 0.55  | 0.60  | -0.17 | 0.83  | 1.91  | -2.74 | -1.84      | 1.18  | -2.15 | -0.10 | 0.80  | 1.12  |
| <b>S4</b>     | 0.64  | -0.55 | -0.88 | -1.23 | 1.43  | -1.18 | 0.19       | 1.68  | -0.71 | -0.24 | 0.15  | 0.69  |
| <b>S5</b>     | -0.07 | NaN   | NaN   | -0.03 | -0.60 | -1.65 | -0.40      | 2.83  | 0.04  | 0.10  | -0.41 | NaN   |
| <b>S6</b>     | NaN   | NaN   | NaN   | NaN   | NaN   | NaN   | 7.20       | 8.33  | 5.68  | NaN   | NaN   | NaN   |
| <b>S7</b>     | NaN   | NaN   | NaN   | NaN   | 2.98  | 1.04  | 7.83       | -5.62 | NaN   | NaN   | NaN   | NaN   |
| <b>S8</b>     | NaN   | NaN   | NaN   | NaN   | -0.38 | -2.04 | -5.94      | -3.51 | 4.36  | 6.05  | NaN   | NaN   |
| ERA5 Land-OBS |       |       |       |       |       |       |            |       |       |       |       |       |
| <b>S1</b>     | -0.03 | NaN   | NaN   | 2.14  | 6.34  | 3.24  | -2.81      | -4.41 | -4.86 | 0.39  | NaN   | NaN   |
| <b>s2</b>     | 0.41  | -0.05 | 0.33  | 2.96  | 1.43  | 1.48  | -2.88      | -1.95 | -1.34 | 1.08  | -1.68 | NaN   |
| <b>S3</b>     | -0.05 | -0.23 | -0.38 | 1.61  | 1.30  | -0.79 | 1.38       | 0.87  | -2.83 | -0.99 | 0.24  | -0.13 |
| <b>S4</b>     | -0.31 | -0.37 | -0.07 | -0.69 | 1.09  | 2.72  | -2.10      | 1.62  | -0.42 | -0.03 | -1.01 | -0.43 |
| <b>S5</b>     | NaN   | NaN   | NaN   | -0.13 | -0.35 | -0.92 | 3.92       | 2.11  | -1.32 | -2.52 | -0.59 | NaN   |
| <b>S6</b>     | NaN   | NaN   | NaN   | NaN   | NaN   | NaN   | -6.90      | 11.35 | 12.51 | NaN   | NaN   | NaN   |
| <b>S7</b>     | -0.60 | NaN   | NaN   | NaN   | -0.60 | 1.67  | -<br>11.83 | 5.24  | 6.11  | NaN   | NaN   | NaN   |
| <b>S8</b>     | NaN   | -0.19 | 0.29  | NaN   | -0.17 | -2.21 | 1.31       | -8.88 | 4.09  | 3.63  | NaN   | NaN   |

Note: NaN means there is no floods occur in certain month simulated by the IMERG, ERA5 Land or OBS datasets.

**Table. S2** The difference of monthly flood magnitudes of IMERG (ERA5 Land) against OBS (Unit: mm).

|               | Jan    | Feb   | Mar   | Apr   | May   | Jun   | Jul   | Aug    | Sep    | Oct    | Nov    | Dec   |
|---------------|--------|-------|-------|-------|-------|-------|-------|--------|--------|--------|--------|-------|
| IMERG-OBS     |        |       |       |       |       |       |       |        |        |        |        |       |
| <b>S1</b>     | 1.79   | NaN   | NaN   | 4.23  | 2.81  | 3.97  | 2.89  | 4.30   | -7.68  | -26.43 | NaN    | NaN   |
| <b>S2</b>     | -1.26  | 7.60  | 2.31  | -0.18 | 0.79  | -0.15 | -2.03 | 2.60   | -7.11  | -1.66  | 3.87   | NaN   |
| <b>S3</b>     | 6.84   | 6.96  | 10.41 | 2.86  | 3.96  | -1.30 | -9.09 | -1.85  | -14.10 | -5.40  | -4.38  | 9.92  |
| <b>S4</b>     | 18.18  | 35.80 | 10.19 | 9.34  | 1.99  | -0.81 | -3.80 | -3.86  | 1.27   | -8.23  | 5.97   | 6.56  |
| <b>S5</b>     | 27.58  | NaN   | NaN   | -1.59 | 3.66  | -2.35 | -0.72 | -3.38  | -4.61  | 2.25   | 4.16   | NaN   |
| <b>S6</b>     | NaN    | NaN   | NaN   | NaN   | NaN   | NaN   | -1.07 | -0.70  | 1.74   | NaN    | NaN    | NaN   |
| <b>S7</b>     | NaN    | NaN   | NaN   | NaN   | -0.19 | -0.31 | 10.14 | 21.45  | NaN    | NaN    | NaN    | NaN   |
| <b>S8</b>     | NaN    | NaN   | NaN   | NaN   | -0.52 | -0.38 | -1.29 | 0.07   | -2.38  | -6.33  | NaN    | NaN   |
| ERA5-Land-OBS |        |       |       |       |       |       |       |        |        |        |        |       |
| <b>S1</b>     | -1.34  | NaN   | NaN   | -1.88 | 0.28  | 2.37  | 0.21  | -3.36  | -12.70 | -27.99 | NaN    | NaN   |
| <b>S2</b>     | -0.42  | 2.14  | -2.30 | -4.12 | 0.99  | -1.69 | -1.88 | -1.49  | -4.37  | -4.70  | 5.45   | NaN   |
| <b>S3</b>     | -11.98 | 2.76  | -7.78 | -1.48 | -0.38 | -6.41 | -4.33 | -10.38 | -11.45 | -8.41  | -2.15  | -6.97 |
| <b>S4</b>     | -1.99  | -8.06 | -9.47 | -1.00 | -4.95 | -8.76 | 0.32  | 2.99   | -4.27  | -8.03  | -14.26 | -4.16 |
| <b>S5</b>     | NaN    | NaN   | NaN   | 22.11 | -6.98 | -3.72 | -3.10 | 1.23   | -4.23  | 0.22   | 7.33   | NaN   |
| <b>S6</b>     | NaN    | NaN   | NaN   | NaN   | NaN   | NaN   | -1.99 | -1.21  | -0.17  | NaN    | NaN    | NaN   |
| <b>S7</b>     | 3.23   | NaN   | NaN   | NaN   | -0.26 | 1.28  | -1.53 | -7.78  | 0.90   | NaN    | NaN    | NaN   |
| <b>S8</b>     | NaN    | -7.01 | 0.13  | NaN   | -3.15 | 0.01  | -2.15 | -1.02  | -4.28  | -8.21  | NaN    | NaN   |

Note: NaN means there is no floods occur in certain month simulated by the IMERG, ERA5 Land or OBS datasets.

**Table. S3** The difference of monthly CMHF fractions of IMERG (ERA5 Land) against OBS (Unit: %).

|               | <b>Jue</b> | <b>Jul</b> | <b>Aug</b> | <b>Sep</b> | <b>Oct</b> |
|---------------|------------|------------|------------|------------|------------|
| IMERG-OBS     |            |            |            |            |            |
| <b>S1</b>     | NaN        | -17.80     | -2.82      | -3.81      | NaN        |
| <b>S2</b>     | NaN        | -18.54     | -6.23      | 2.85       | NaN        |
| <b>S3</b>     | -1.46      | 4.80       | -0.02      | -1.03      | NaN        |
| <b>S4</b>     | -2.46      | -3.34      | -4.55      | -12.87     | NaN        |
| <b>S5</b>     | -5.74      | -1.48      | 3.56       | -0.15      | NaN        |
| <b>S6</b>     | NaN        | 36.67      | 25.45      | 20.00      | NaN        |
| <b>S7</b>     | NaN        | -26.01     | -16.07     | NaN        | NaN        |
| <b>S8</b>     | NaN        | 2.26       | -17.53     | 5.09       | -0.60      |
| ERA5 Land-OBS |            |            |            |            |            |
| <b>S1</b>     | NaN        | -9.32      | -13.61     | -8.19      | NaN        |
| <b>S2</b>     | NaN        | -10.12     | -3.26      | -3.60      | NaN        |
| <b>S3</b>     | -1.85      | 5.54       | -3.07      | -3.27      | NaN        |
| <b>S4</b>     | -0.52      | 0.49       | -3.21      | -3.32      | NaN        |
| <b>S5</b>     | -0.36      | -2.43      | 1.37       | -2.95      | NaN        |
| <b>S6</b>     | NaN        | 51.82      | -2.16      | 10.77      | NaN        |
| <b>S7</b>     | NaN        | -5.56      | -11.90     | NaN        | NaN        |
| <b>S8</b>     | NaN        | -32.78     | 0.58       | -7.52      | NaN        |

Note: NaN means there is no CMHF occur in certain month simulated by the IMERG, ERA5 Land or OBS datasets (CMHF only occur in certain month during the warm season).

**Table. S4** The difference of monthly CMHF magnitudes of IMERG (ERA5 Land) against OBS (Unit: mm).

|               | <b>Jun</b> | <b>Jul</b> | <b>Aug</b> | <b>Sep</b> | <b>Oct</b> |
|---------------|------------|------------|------------|------------|------------|
| IMERG-OBS     |            |            |            |            |            |
| <b>S1</b>     | NaN        | 3.94       | 3.14       | -14.05     | NaN        |
| <b>S2</b>     | NaN        | -4.62      | 5.53       | -11.82     | NaN        |
| <b>S3</b>     | -38.56     | -3.62      | 4.03       | -16.89     | NaN        |
| <b>S4</b>     | 5.41       | -7.82      | -2.01      | -19.36     | NaN        |
| <b>S5</b>     | 3.96       | -5.04      | -3.35      | -8.44      | NaN        |
| <b>S6</b>     | NaN        | 0.53       | -0.76      | 4.68       | NaN        |
| <b>S7</b>     | NaN        | 1.51       | 24.63      | NaN        | NaN        |
| <b>S8</b>     | NaN        | 0.24       | 0.65       | -1.97      | -33.63     |
| ERA5 Land-OBS |            |            |            |            |            |
| <b>S1</b>     | NaN        | 0.19       | -8.05      | -3.48      | NaN        |
| <b>S2</b>     | NaN        | 0.03       | -6.66      | 3.19       | NaN        |
| <b>S3</b>     | -24.00     | -3.57      | -2.43      | -8.74      | NaN        |
| <b>S4</b>     | -5.28      | 0.17       | 26.36      | -22.00     | NaN        |
| <b>S5</b>     | -10.22     | -8.42      | 7.79       | -4.71      | NaN        |
| <b>S6</b>     | NaN        | 0.32       | -1.04      | 1.38       | NaN        |
| <b>S7</b>     | NaN        | 0.16       | 0.00       | NaN        | NaN        |
| <b>S8</b>     | NaN        | 0.15       | -1.43      | -7.76      | NaN        |

Note: NaN means there is no CMHF occur in certain month simulated by the IMERG, ERA5 Land or OBS datasets (CMHF only occur in certain month during the warm season).
